# Supplementary material for: A fast response and highly sensitive flexible humidity sensor based on a nanocomposite film of MoS2 and graphene oxide
Source: Royal Society of Chemistry journal article supplement (doi:10.1039/d4nr02207f), 2024-01-01
Supplement: d4nr02207f1.pdf [file d4nr02207f1.pdf]

## Supporting Information

### **Fast response and highly sensitive flexible humidity sensor based on nanocomposite film of MoS<sub>2</sub> and graphene oxide**

Gengwu Ge,<sup>1,2</sup> Ningfeng Ke,<sup>1,2,4</sup> Hongliang Ma,<sup>1,2,3</sup> Jie Ding,<sup>3\*</sup> Wendong Zhang,<sup>5,6\*</sup> and Xuge Fan<sup>1,2,3\*</sup>

<sup>1</sup>Advanced Research Institute for Multidisciplinary Science, Beijing Institute of Technology, Beijing 100081, China.

<sup>2</sup>Center for Interdisciplinary Science of Optical Quantum and NEMS Integration, Beijing Institute of Technology, 100081 Beijing, China.

<sup>3</sup>School of Integrated Circuits and Electronics, Beijing Institute of Technology, Beijing 100081, China.

<sup>4</sup>Yangtze Delta Region Academy of Beijing Institute of Technology, Jiaxing 314003, China.

<sup>5</sup>State Key Laboratory of Dynamic Measurement Technology, North University of China, Taiyuan 030051, China.

<sup>6</sup>National Key Laboratory for Electronic Measurement Technology, School of Instrument and Electronics, North University of China, Taiyuan 030051, China.

\*Email: xgf@bit.edu.cn, jie.ding@bit.edu.cn, wdzhang@nuc.edu.cn

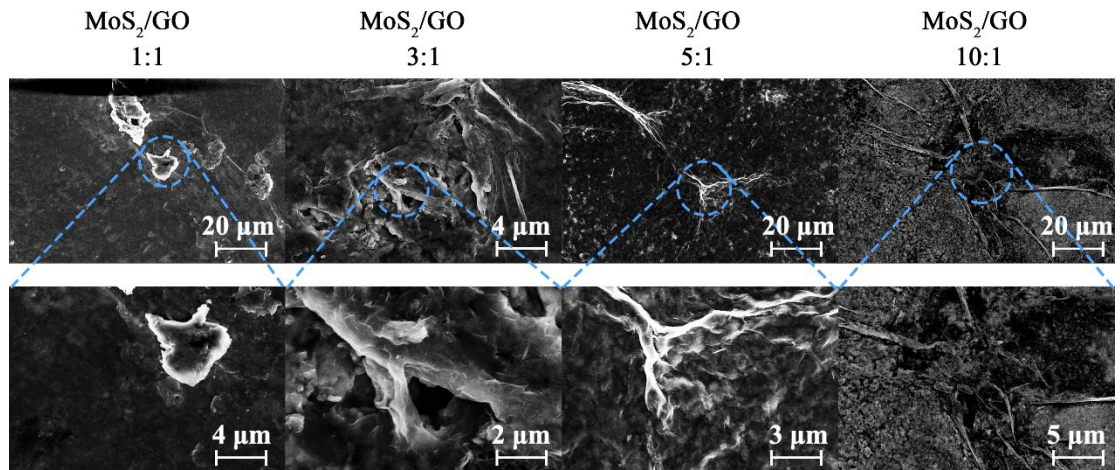

**Figure S1.** SEM images of the prepared MoS<sub>2</sub>/GO composite films using 0.1 mL dispersion with different volume ratios of MoS<sub>2</sub>/GO.

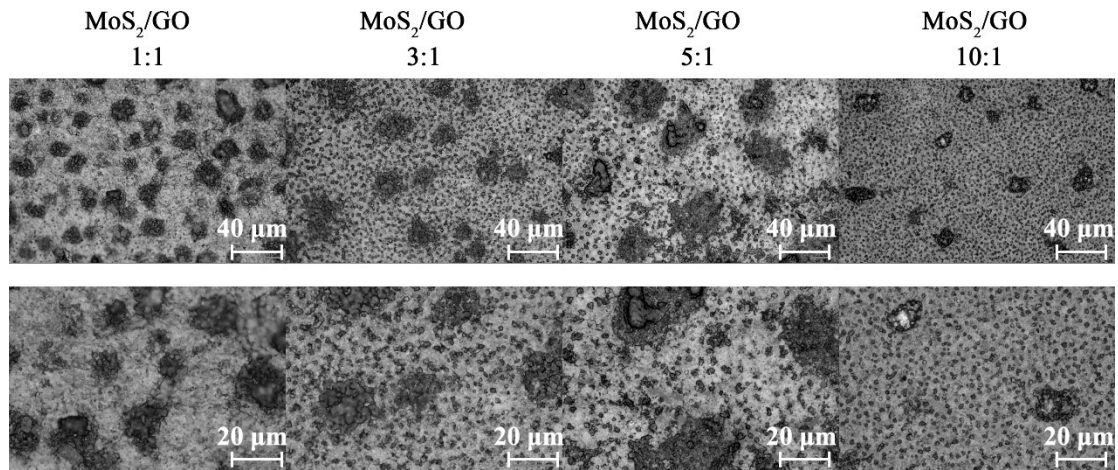

**Figure S2.** Optical microscope images of the prepared MoS<sub>2</sub>/GO composite films using 0.05 mL dispersion with different volume ratios of MoS<sub>2</sub>/GO. The MoS<sub>2</sub> and GO can be distinguished from the prepared MoS<sub>2</sub>/GO composite films, in which dark agglomerations with large area were GO due to agglomeration effect while scattered granular structures were MoS<sub>2</sub>.

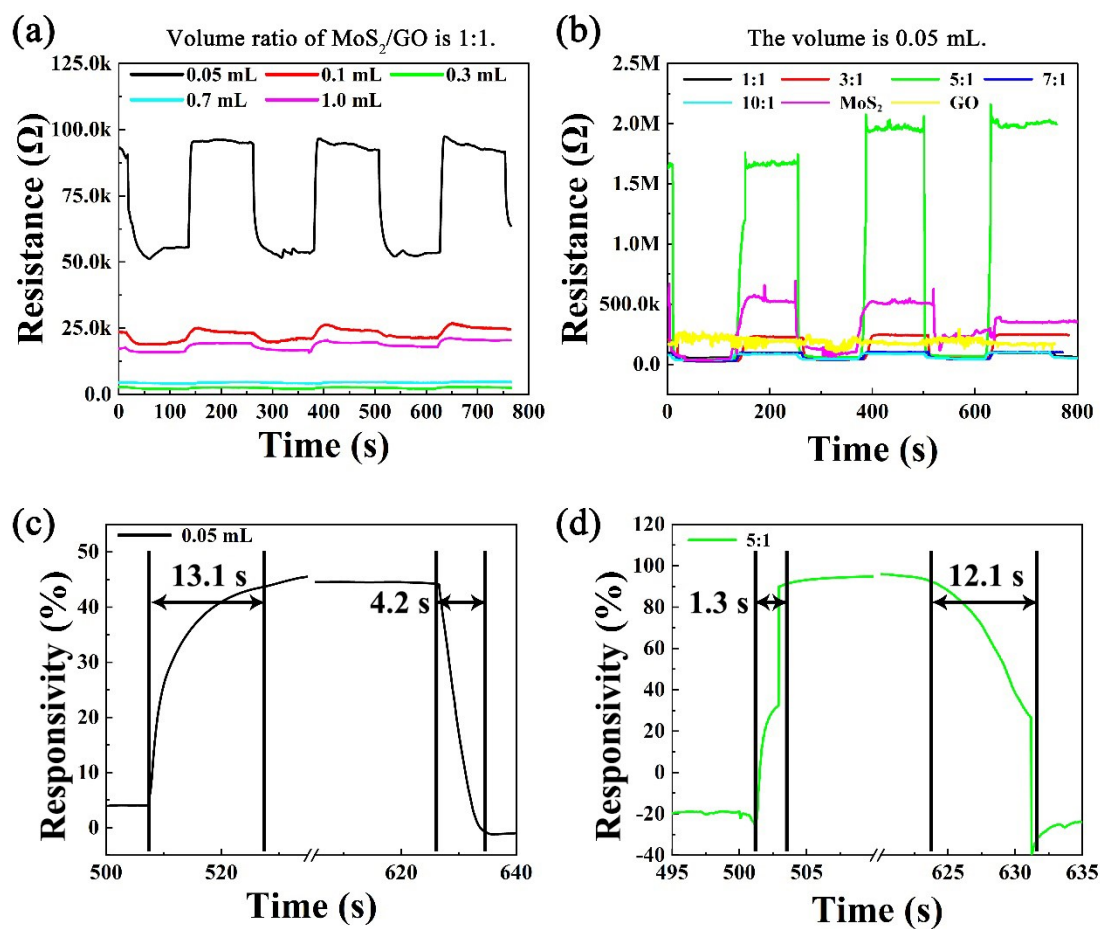

**Figure S3. Humidity measurements.** (a) Several cycles of humidity measurements of humidity sensors that were prepared by using different volumes of  $\text{MoS}_2/\text{GO}$  dispersions with volume ratio of 1:1, showing the absolute resistance of the prepared humidity sensors changed with the time. The relative humidity was changed between 11%RH and 98%RH. (b) Several cycles of humidity measurements of humidity sensors that were prepared by using 0.05 mL pure  $\text{MoS}_2$  dispersion, 0.05 mL pure GO dispersion and 0.05 mL  $\text{MoS}_2/\text{GO}$  dispersions with different volume ratios, showing the absolute resistance of the prepared humidity sensors changed with the time. The relative humidity was changed between 1%RH and 98%RH. (c) Part of curves in (a) about humidity measurements of the humidity sensor that was prepared by using 0.05 mL  $\text{MoS}_2/\text{GO}$  dispersion with volume ratio of 1:1, showing the measurements of the response time and recovery time in detail. (d) Part of curves in (b) about humidity measurements of the humidity sensor that was prepared by using 0.05 mL  $\text{MoS}_2/\text{GO}$

dispersion with volume ratio of 5:1, showing the measurements of the response time and recovery time in detail.

**Table S1.** The resistance values of the humidity sensors that were prepared by using different volumes of MoS<sub>2</sub>/GO dispersions with the volume ratio of 1:1 at 11% RH and 98% RH.

| Volume (mL) | Resistance ( $\Omega$ ) at 11% RH | Resistance ( $\Omega$ ) at 98% RH |
|-------------|-----------------------------------|-----------------------------------|
| 0.05        | 93106                             | 51312                             |
| 0.1         | 23546                             | 18820                             |
| 0.3         | 2708                              | 2145                              |
| 0.5         | 2913                              | 2557                              |
| 0.7         | 4476                              | 4082                              |
| 1.0         | 17205                             | 16124                             |

**Table S2.** The resistance values of the humidity sensors that were prepared by using 0.05 mL pure GO dispersion, 0.05 mL pure MoS<sub>2</sub> dispersion, and 0.05 mL MoS<sub>2</sub>/GO dispersion with different volume ratios at 11% RH and 98% RH.

| Volume ratio of MoS <sub>2</sub> /GO | Resistance ( $\Omega$ ) at 11% RH | Resistance ( $\Omega$ ) at 98% RH |
|--------------------------------------|-----------------------------------|-----------------------------------|
| Pure GO                              | 165403                            | -                                 |
| 1:1                                  | 93106                             | 51312                             |
| 3:1                                  | 220952                            | 45619                             |
| 5:1                                  | 1651733                           | 33839                             |
| 7:1                                  | 93362                             | 42644                             |
| 10:1                                 | 83832                             | 40012                             |
| Pure MoS <sub>2</sub>                | 501613                            | 36869                             |
